# Supplementary material
Source: PubMed Central journal article supplement (PMC2976437)
Supplement: supp_192_22_5866__2.pdf [file supp_192_22_5866__2.pdf]

**Table A1. Summary of gene and corresponding protein product information and denomination of six opsins and three cognate transducers from the original genome project and the present study.**

| <b>Gene</b> | <b>Locus tag</b> | <b>Annotated product</b>                | <b>Genome project note</b> | <b>AA length</b> | <b>Protein name in this study</b> | <b>Gene name in this study</b> |
|-------------|------------------|-----------------------------------------|----------------------------|------------------|-----------------------------------|--------------------------------|
| <i>bop</i>  | rrnAC3161        | bacteriorhodopsin                       |                            | 250              | HmBRI                             | <i>bop</i>                     |
| <i>hop</i>  | rrnAC1659        | halorhodopsin precursor                 | HR                         | 276              | HmHR                              | <i>hop</i>                     |
| <i>htr</i>  | rrnAC3281        | MCP domain-containing signal transducer | soluble protein            | 431              | HmHtrI                            |                                |
|             |                  |                                         |                            | 528              | reHmHtrI                          | <i>htr1</i>                    |
| <i>sop1</i> | rrnAC3280        | sensory rhodopsin I                     | SR-I                       | 236              | HmSRI                             | <i>sop1</i>                    |
| <i>htr</i>  | rrnAC0013        | MCP domain-containing signal transducer | membrane protein           | 773              | HmHtrII                           | <i>htr2</i>                    |
| <i>sop2</i> | rrnAC0014        | sensory rhodopsin 1                     |                            | 236              | HmSRII                            | <i>sop2</i>                    |
| <i>xop1</i> | rrnAC2030        | bacteriorhodopsin precursor             | BR                         | 250              | HmBRII                            | <i>xop1</i>                    |
| <i>xop2</i> | rrnAC0559        | opsin of unknown function               |                            | 232              | HmSRM                             | <i>xop2</i>                    |
|             | rrnAC0558        | HAMP domain-containing protein          | signal transducer          | 184              | HmHtrM                            | <i>htrM</i>                    |

**Table A2. Primers used for the reverse transcriptase PCR experiments.**

| Gene        | Primer ID | Sequences<br>5'-->3'  | Blast matched<br>Genome site | Gene site         |
|-------------|-----------|-----------------------|------------------------------|-------------------|
| <i>bop</i>  | bop F     | ATGCCAGCACCAGGGAGCGAA | 2793474 > 2793494            | 2793474 > 2794226 |
|             | bop R     | GTCTGCAGGCGTTGCGCCAGT | 2794200 < 2794220            |                   |
| <i>hop</i>  | hop F     | TTCATCGATCTGGGTGAACA  | 1490073 < 1490092            | 1489351 < 1490181 |
|             | hop R     | CCAGAGCACACAGTGAGAA   | 1489561 > 1489580            |                   |
| <i>sop1</i> | sop1 F    | GGGGTTGCAGGTATCTCGTA  | 2902787 < 2902806            | 2902231 < 2902941 |
|             | sop1 R    | CGTCGGGCGTAGAAAAAGTA  | 2902295 > 2901314            |                   |
| <i>sop2</i> | sop2 F    | GTTCACGCTGGGATTACTGG  | 14091 > 14110                | 14071 > 14781     |
|             | sop2 R    | ACCACGTCGAGGTAAACGAC  | 14662 < 14681                |                   |
| <i>xop1</i> | xop1 F    | GGTGTAGAGGGCGAAGGAAT  | 1819355 < 1819374            | 1818640 < 1819401 |
|             | xop1 R    | TTGAACGTCGACTGTGCTTC  | 1818869 > 1818888            |                   |
| <i>xop2</i> | xop2 F    | CTACTACCTGCCGCCGATAC  | 495417 < 495436              | 494845 < 495543   |
|             | xop2 R    | TTTGGCAATGGTGTCAAGAA  | 494929 > 494948              |                   |
| <i>htr1</i> | htr1 F    | CCACAGCCTACCAGGACATT  | 2904087 < 2904106            | 2902941 < 2904236 |
|             | htr1 R    | ATCTGGTCCATCTCCGTCAG  | 2903644 > 2903663            |                   |
| <i>htr2</i> | htr2 F    | ACGGAGAAACAGCAACGACT  | 12020 > 12039                | 11747 > 14068     |
|             | htr2 R    | GGTCAGCCCATCAACATAC   | 12513 < 12532                |                   |
| <i>htrM</i> | htrM F    | TAGGAGCGGTGTTGGTTCTT  | 494705 < 494724              | 494219 < 494773   |
|             | htrM R    | TATCGGGAATCGATCTCTGC  | 494220 > 494239              |                   |
